# Supplementary material
Source: PubMed Central journal article supplement (PMC3255580)
Supplement: mt2011192x5.pdf [file mt2011192x5.pdf]

## SUPPLEMENTARY TABLES

| <b>Table S1. Oligonucleotide Sequences to Study Peripheral Tissue Antigen Expression</b> |                                                     |                |                                                     |
|------------------------------------------------------------------------------------------|-----------------------------------------------------|----------------|-----------------------------------------------------|
| <i>Mouse</i>                                                                             |                                                     | <i>Human</i>   |                                                     |
| Primer                                                                                   | Sequence                                            | Primer         | Sequence                                            |
| RetS-Ag                                                                                  | F: TGACTACCTACCCTGTTTCAG<br>R: TTCACTGGATGTGAGCTCTC | RetS-Ag        | F: CGCAGGGACCTGTACTTCTC<br>R: TCAGGAGAAAGGGGTACGTG  |
| iFABP                                                                                    | F: ACGGCACGTGGAAAGTAGAC<br>R: AGAAACCTCTCGGACAGCAA  | Gad67          | F: AGCACCGCCATAAACTCAAC<br>R: ATCTGGTTGCATCCTTGGAG  |
| II-FABP                                                                                  | F: GGACAGGACTTCACCTGGTC<br>R: CAAGCCAGCCTCTTGCTTAC  | iFABP          | F: AAAGAATCAAGCGCTTTTCG<br>R: TCCATTGTCTGTCCGTTTGA  |
| CK-8                                                                                     | F: ATGCTGGAGACCAAATGGAG<br>R: CCTCATACTGGGCACGAACT  | ii-FABP        | F: TAATCGAAAAGGCCCAACAAC<br>R: ATGTTGCTTTCTTGCCAAC  |
| A33                                                                                      | F: CCGAAGTCAGACGGAAAGAG<br>R: TGCTGGAGGTGCAGATGTAG  | CK-8           | F: GACATGGACAGCATCATTGC<br>R: GGCTCTGCAGCTCCTCATAAC |
| INS-1                                                                                    | F: TGTTGGTGCACCTTCTACCC<br>R: TAGAGGGAGCAAATGCTGGT  | AFP            | F: AGCTTGGTGGTGGATGAAAC<br>R: TCTTGCTTCATCGTTTGCAG  |
| Gad67                                                                                    | F: TGCAACCTCCTCGAACGCGG<br>R: CCAGGATCTGCTCCAGAGAC  | INS-1          | F: GGAACGAGGCTTCTTCTAC<br>R: CACAATGCCACGCTTCTG     |
| AFP                                                                                      | F: CTCAGCGAGGAGAAATGGTC<br>R: CTCAGCGAGGAGAAATGGTC  | A33            | F: CTTTCGCAGGGAAAGAGTGTC<br>R: GACTGCTCAGCATTGTTGGA |
| Aire                                                                                     | F: TGGTCCCTGAGGACAAGTTC<br>R: TGAATTCCGTTTCCAAGAGG  | $\beta$ -actin | F: CTCAGCGAGGAGAAATGGTC<br>R: CTCAGCGAGGAGAAATGGTC  |
| GAPDH                                                                                    | F: ATGACATCAAGAAGGTGGTG<br>R: CATACCAGGAAATGAGCTTG  | Aire           | F: GAACGGGATTTCAGACCATGT<br>R: AACCTGGATGCACTTCTTGG |
|                                                                                          |                                                     | MOG            | F: TCACCTGCTTCTTCCGAGAT<br>R: GAGGAGAACCAGCACTCCAG  |

Abbreviations: RetS-Ag, Retinal-S Antigen; iFABP, intestinal fatty acid binding protein; iiFABP, ileal fatty acid binding protein; CK, cytokeratin; GAD, glutamate decarboxylase; INS, insulin; AFP, alpha-fetoprotein; GAPDH, Glyceraldehyde 3-phosphate dehydrogenase; MOG, myelin oligodendrocyte glycoprotein; AIRE, autoimmune regulator
