# Supplementary material
Source: PubMed Central journal article supplement (PMC3255580)

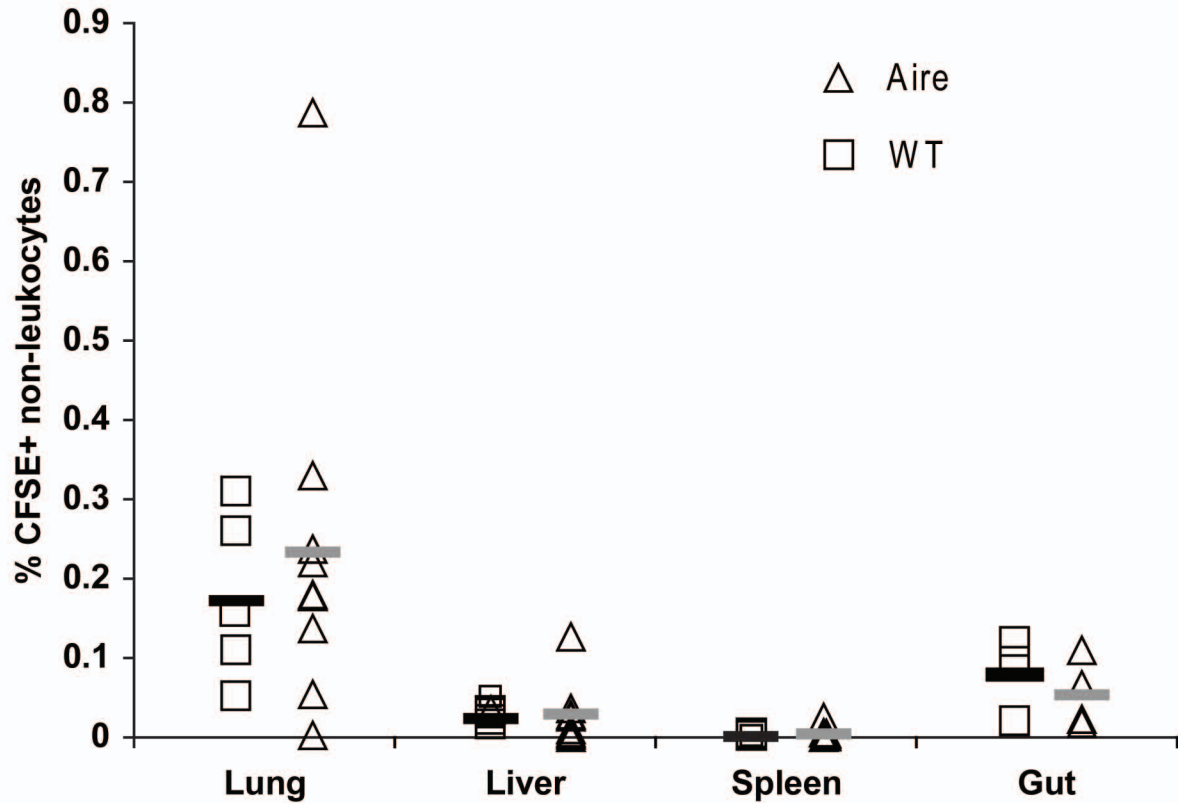

Supplement: mt2011192x1.pdf [file mt2011192x1.pdf]

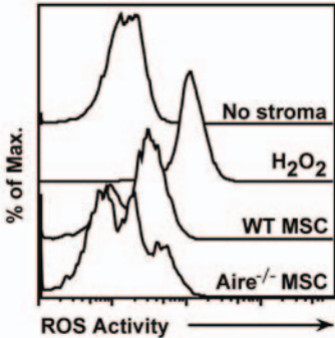

Supplement: mt2011192x2.pdf [file mt2011192x2.pdf]

**a**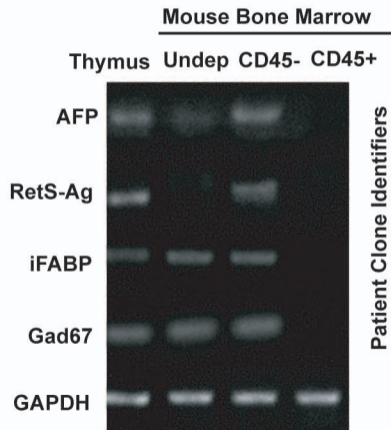**b**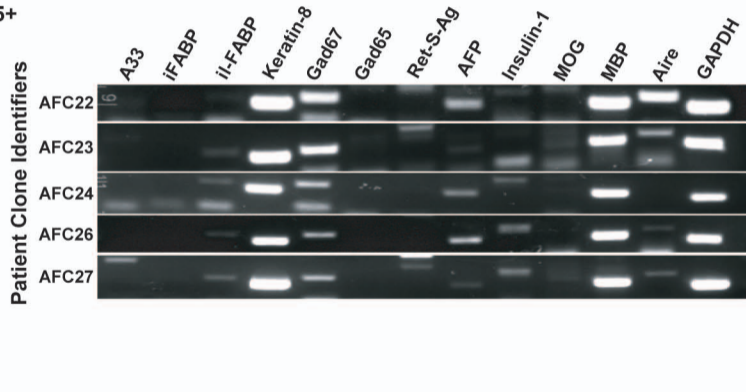**c**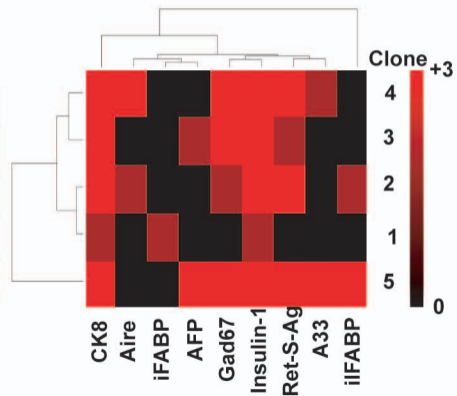

Supplement: mt2011192x3.pdf [file mt2011192x3.pdf]

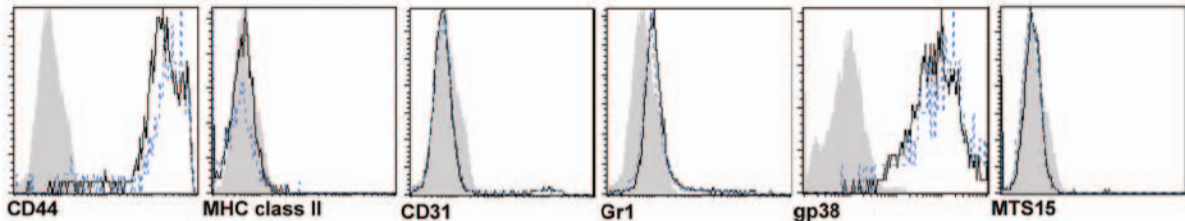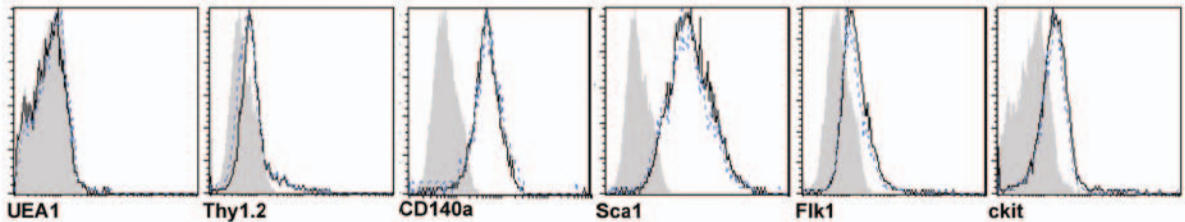

Supplement: mt2011192x4.pdf [file mt2011192x4.pdf]
